# Supplementary material
Source: MDPI journal article supplement (https://www.mdpi.com/1999-4907/13/7/990)

## Supplementary Materials

Table S1\_1 Rho values of spearman correlations between seedling traits of all woody species (liana and tree combined). Asterisks indicate significance level of the correlation ( \*p<0.05, \*\*p<0.01, \*\*\*p<0.001). LA is leaf area, LDMC is leaf dry matter content, SLA is specific leaf area, LAR is leaf area ratio, LMF is leaf mass fraction, SDMC is stem dry matter content, SMF is stem mass fraction, SSL is specific stem length, RDMC is root dry matter content, RMF is root mass fraction, SRL is specific root length.

|      | LMF  | SMF      | RMF      | LAR      | SDMC     | RDMC     | SSL      | SRL      | LDMC    | SLA      |
|------|------|----------|----------|----------|----------|----------|----------|----------|---------|----------|
| LA   | 0.05 | 0        | -0.02    | -0.19*   | -0.05    | -0.06    | -0.52*** | -0.48*** | -0.15   | -0.24**  |
| LMF  |      | -0.45*** | -0.77*** | 0.57***  | -0.22**  | -0.10    | 0.30***  | 0.38***  | -0.17*  | -0.09    |
| SMF  |      |          | -0.20*   | -0.20*   | 0.10     | 0.07     | -0.14    | 0        | 0.12    | 0.14     |
| RMF  |      |          |          | -0.51*** | 0.18*    | 0.06     | -0.25**  | -0.43*** | 0.11    | -0.02    |
| LAR  |      |          |          |          | -0.58*** | -0.35*** | 0.66***  | 0.66***  | -0.4*** | 0.72***  |
| SDMC |      |          |          |          |          | 0.82***  | -0.30*** | -0.21**  | 0.71*** | -0.51*** |
| RDMC |      |          |          |          |          |          | -0.18*   | -0.06    | 0.59*** | -0.37*** |
| SSL  |      |          |          |          |          |          |          | 0.85***  | -0.02   | 0.46***  |
| SRL  |      |          |          |          |          |          |          |          | -0.05   | 0.44***  |
| LDMC |      |          |          |          |          |          |          |          |         | -0.40*** |

Table S1\_2 Rho values of spearman correlations between seedling traits of tree species. Asterisks indicate significance level of the correlation (\*p<0.05, \*\*p<0.01, \*\*\*p<0.001). LA is leaf area, LDMC is leaf dry matter content, SLA is specific leaf area, LAR is leaf area ratio, LMF is leaf mass fraction, SDMC is stem dry matter content, SMF is stem mass fraction, SSL is specific stem length, RDMC is root dry matter content, RMF is root mass fraction, SRL is specific root length.

|      | LMF  | SMF      | RMF      | LAR      | SDMC     | RDMC     | SSL      | SRL      | LDMC    | SLA      |
|------|------|----------|----------|----------|----------|----------|----------|----------|---------|----------|
| LA   | 0.13 | -0.04    | -0.08    | -0.07    | -0.15    | -0.17    | -0.45*** | -0.44*** | -0.29** | -0.16    |
| LMF  |      | -0.47*** | -0.76*** | 0.54***  | -0.09    | 0.02     | 0.27**   | 0.36***  | 0.01    | -0.19    |
| SMF  |      |          | -0.19    | -0.19    | 0.05     | 0        | -0.16    | 0        | 0.06    | 0.19     |
| RMF  |      |          |          | -0.50*** | 0.06     | -0.02    | -0.22*   | -0.41*** | -0.05   | 0.03     |
| LAR  |      |          |          |          | -0.51*** | -0.34*** | 0.60***  | 0.61***  | -0.27** | 0.65***  |
| SDMC |      |          |          |          |          | 0.83***  | -0.27**  | -0.19    | 0.63*** | -0.50*** |
| RDMC |      |          |          |          |          |          | -0.22*   | -0.13    | 0.51*** | -0.40*** |
| SSL  |      |          |          |          |          |          |          | 0.87***  | 0.12    | 0.33***  |
| SRL  |      |          |          |          |          |          |          |          | 0.08    | 0.31**   |
| LDMC |      |          |          |          |          |          |          |          |         | -0.39*** |

Table S1\_3 Rho values of spearman correlations between seedling traits of liana species. Asterisks indicate significance level of the correlation (\*p<0.05, \*\*p<0.01, \*\*\*p<0.001). LA is leaf area, LDMC is leaf dry matter content, SLA is specific leaf area, LAR is leaf area ratio, LMF is leaf mass fraction, SDMC is stem dry matter content, SMF is stem mass fraction, SSL is specific stem length, RDMC is root dry matter content, RMF is root mass fraction, SRL is specific root length.

|      | LMF   | SMF    | RMF      | LAR      | SDMC     | RDMC    | SSL      | SRL      | LDMC     | SLA      |
|------|-------|--------|----------|----------|----------|---------|----------|----------|----------|----------|
| LA   | -0.14 | -0.08  | 0.23     | -0.27    | 0.01     | 0.03    | -0.61*** | -0.55*** | 0.06     | -0.26    |
| LMF  |       | -0.4** | -0.81*** | 0.64***  | -0.44*** | -0.26   | 0.38**   | 0.42**   | -0.43**  | 0.04     |
| SMF  |       |        | -0.19    | -0.12    | 0.15     | 0.13    | 0.06     | 0.11     | 0.19     | 0.19     |
| RMF  |       |        |          | -0.64*** | 0.42**   | 0.23    | -0.45*** | -0.54*** | 0.37**   | -0.2     |
| LAR  |       |        |          |          | -0.62*** | -0.30*  | 0.66***  | 0.65***  | -0.55*** | 0.76***  |
| SDMC |       |        |          |          |          | 0.79*** | -0.26    | -0.15    | 0.81***  | -0.48*** |

|      |      |         |        |         |
|------|------|---------|--------|---------|
| RDMC | 0.04 | 0.13    | 0.7*** | -0.22   |
| SSL  |      | 0.84*** | -0.18  | 0.56*** |
| SRL  |      |         | -0.14  | 0.52*** |
| LDMC |      |         |        | -0.4**  |

Table S2 Linear mixed model results for the differences between lianas and tree. The Chi-Squared value and p-values are given for the differences between the two group. For the random effects, we report the standard deviation (which is a measure for the variability for each random effect added to the model). We considered the following traits: LA is leaf area in cm<sup>2</sup>, LDMC is leaf dry matter content in g g<sup>-1</sup>, SLA is specific leaf area in cm<sup>2</sup> g<sup>-1</sup>, LAR is leaf area ratio in cm<sup>2</sup> g<sup>-1</sup>, LMF is leaf mass fraction in g g<sup>-1</sup>, SDMC is stem dry matter content in g g<sup>-1</sup>, SMF is stem mass fraction g g<sup>-1</sup>, SSL is specific stem length in cm g<sup>-1</sup>, RDMC is root dry matter content in g g<sup>-1</sup>, RMF is root mass fraction in g g<sup>-1</sup>, SRL is specific root length cm g<sup>-1</sup>.

| Trait | Species random effect (s.d.) | Fixed effect    |                  |                  |                  |
|-------|------------------------------|-----------------|------------------|------------------|------------------|
|       |                              | Individual size |                  | Functional group |                  |
|       |                              | $\chi^2$        | p-value          | $\chi^2$         | p-value          |
| LA    | 0.47                         | <b>4634.71</b>  | <b>&lt;0.001</b> | 1.01             | 0.314            |
| LDMC  | 0.26                         | <b>60.07</b>    | <b>&lt;0.001</b> | 0.86             | 0.353            |
| SLA   | 0.23                         | <b>424.55</b>   | <b>&lt;0.001</b> | <b>11.36</b>     | <b>0.001</b>     |
| LAR   | 0.24                         | <b>1037.98</b>  | <b>&lt;0.001</b> | 2.69             | 0.101            |
| LMF   | 0.22                         | <b>377.01</b>   | <b>&lt;0.001</b> | 2.52             | 0.110            |
| SDMC  | 0.19                         | <b>211.75</b>   | <b>&lt;0.001</b> | 1.19             | 0.275            |
| SMF   | 0.14                         | <b>368.89</b>   | <b>&lt;0.001</b> | 1.44             | 0.231            |
| SSL   | 0.18                         | <b>8775.62</b>  | <b>&lt;0.001</b> | <b>54.46</b>     | <b>&lt;0.001</b> |
| RDMC  | 0.17                         | <b>104.87</b>   | <b>&lt;0.001</b> | 2.70             | 0.100            |
| RMF   | 0.26                         | 0.03            | 0.871            | 0.05             | 0.814            |
| SRL   | 0.20                         | <b>9676.98</b>  | <b>&lt;0.001</b> | 0.70             | 0.402            |

Table S3 Linear mixed model results for the differences between multivariate clusters. The Chi-Squared value and p-values are given for the differences between the clusters. For the random effects, we report the standard deviation (which is a measure for the variability for each random effect added to the model). We considered the following traits: LA is leaf area, LDMC is leaf dry matter content, SLA is specific leaf area, LAR is leaf area ratio, LMF is leaf mass fraction, SDMC is stem dry matter content, SMF is stem mass fraction, SSL is stem length ratio, RDMC is root dry matter content, RMF is root mass fraction, and SRL is specific root length.

| trait | Species random effect (s.d.) | Fixed effect    |                  |              |                  |
|-------|------------------------------|-----------------|------------------|--------------|------------------|
|       |                              | Individual size |                  | Cluster      |                  |
|       |                              | $\chi^2$        | p-value          | $\chi^2$     | p-value          |
| LA    | 0.47                         | <b>4632.00</b>  | <b>&lt;0.001</b> | 1.45         | =0.229           |
| LDMC  | 0.23                         | <b>53.08</b>    | <b>&lt;0.001</b> | <b>29.76</b> | <b>&lt;0.001</b> |
| SLA   | 0.20                         | <b>405.95</b>   | <b>&lt;0.001</b> | <b>65.44</b> | <b>&lt;0.001</b> |
| LAR   | 0.19                         | <b>957.15</b>   | <b>&lt;0.001</b> | <b>69.71</b> | <b>&lt;0.001</b> |
| LMF   | 0.22                         | <b>355.38</b>   | <b>&lt;0.001</b> | 1.03         | =0.310           |
| SDMC  | 0.17                         | <b>193.76</b>   | <b>&lt;0.001</b> | <b>35.79</b> | <b>&lt;0.001</b> |
| SMF   | 0.14                         | <b>369.03</b>   | <b>&lt;0.001</b> | 3.24         | =0.070           |
| SSL   | 0.20                         | <b>8460.14</b>  | <b>&lt;0.001</b> | <b>23.87</b> | <b>&lt;0.001</b> |
| RDMC  | 0.16                         | <b>96.22</b>    | <b>&lt;0.001</b> | <b>19.49</b> | <b>&lt;0.001</b> |

|     |      |                |                  |              |                  |
|-----|------|----------------|------------------|--------------|------------------|
| RMF | 0.25 | 0.54           | 0.462            | <b>14.95</b> | <b>&lt;0.001</b> |
| SRL | 0.19 | <b>9410.82</b> | <b>&lt;0.001</b> | <b>12.24</b> | <b>&lt;0.001</b> |

Table S4. Summaries of species collected for functional traits. Cluster indicates the results of multivariate clusters, 1 is tree dominated cluster and 2 is liana dominated cluster, OG indicates species classified as specialist of old-growth forest, SG indicates species classified as specialist of secondary-growth forest, Generalist indicates species, Too\_rare indicates species which do not have enough individuals for classification. The habitat affinity classification (speciall)used the data of trees and lianas (W. Chanthorn, unpublished data) from second-growth forest plots located in the same landscape as the MSP. Total\_OF and Total\_SF refer to individuals of same species found in old-growth forest and secondary forest respectively.

| Species name                 | Family         | Functional group | Cluster | Total_OF | Total_SF | Habitat affinity |
|------------------------------|----------------|------------------|---------|----------|----------|------------------|
| Actinodaphne angustifolia    | Lauraceae      | Tree             | 1       | 563      | 1        | Specialist_OF    |
| Aglaia elaeagnoides          | Meliaceae      | Tree             | 1       | 4500     | 11       | Specialist_OF    |
| Aglaia lawii                 | Meliaceae      | Tree             | 1       | 1036     | 1        | Specialist_OF    |
| Alchornea rugosa             | Euphorbiaceae  | Tree             | 1       | 1892     | 5        | Specialist_OF    |
| Alphonsea boniana            | Annonaceae     | Tree             | 1       | 600      | 0        | Specialist_OF    |
| Anaxagorea luzonensis        | Annonaceae     | Tree             | 1       |          |          | Too_rare         |
| Antiaris toxicaria           | Moraceae       | Tree             | 1       | 126      | 0        | Specialist_OF    |
| Antidesma montanum           | Phyllanthaceae | Tree             | 1       | 308      | 0        | Specialist_OF    |
| Antidesma sootepense         | Phyllanthaceae | Tree             | 1       | 223      | 0        | Specialist_OF    |
| Aphanamixis polystachya      | Meliaceae      | Tree             | 1       | 2263     | 11       | Specialist_OF    |
| Aphananthe cuspidata         | Ulmaceae       | Tree             | 1       | 98       | 0        | Specialist_OF    |
| Aporosa octandra             | Euphorbiaceae  | Tree             | 1       | 1867     | 0        | Specialist_OF    |
| Ardisia nervosa              | Myrsinaceae    | Tree             | 1       | 2796     | 0        | Specialist_OF    |
| Ardisia sanguinolenta        | Myrsinaceae    | Tree             | 1       | 7272     | 70       | Specialist_OF    |
| Baccaurea ramiflora          | Phyllanthaceae | Tree             | 1       | 1191     | 7        | Specialist_OF    |
| Beilschmiedia aff.intermedia | Lauraceae      | Tree             | 1       | 667      | 1        | Specialist_OF    |
| Beilschmiedia glauca         | Lauraceae      | Tree             | 1       | 3530     | 1        | Specialist_OF    |
| Beilschmiedia maingayi       | Lauraceae      | Tree             | 1       | 1606     | 0        | Specialist_OF    |
| Camellia oleifera            | Theaceae       | Tree             | 1       | 1282     | 1        | Specialist_OF    |
| Canthium coffeoides          | Rubiaceae      | Tree             | 1       | 186      | 34       | Generalist       |
| Casearia grewiaefolia        | Salicaceae     | Tree             | 1       | 440      | 2        | Specialist_OF    |

|                           |                   |      |   |       |      |               |
|---------------------------|-------------------|------|---|-------|------|---------------|
| Chionanthus ramiflorus    | Oleaceae          | Tree | 1 | 292   | 1    | Specialist_OF |
| Chukrasia tabularis       | Meliaceae         | Tree | 1 | 39    | 0    | Too_rare      |
| Cinnamomum iners          | Lauraceae         | Tree | 1 | 75    | 171  | Specialist_SF |
| Cinnamomum subavenium     | Lauraceae         | Tree | 1 | 17035 | 126  | Specialist_OF |
| Clausena excavata         | Rutaceae          | Tree | 1 | 27    | 2341 | Specialist_SF |
| Daphniphyllum beddomei    | Daphniphyllaceae  | Tree | 1 | 82    | 26   | Generalist    |
| Dasymaschalon acuminatum  | Annonaceae        | Tree | 1 | 1662  | 4    | Specialist_OF |
| Dipterocarpus gracilis    | Dipterocarpaceae  | Tree | 1 | 4047  | 8    | Specialist_OF |
| Dysoxylum cyrtobotryum    | Meliaceae         | Tree | 1 | 922   | 8    | Specialist_OF |
| Eugenia cerasoides        | Myrtaceae         | Tree | 1 | 1923  | 1731 | Specialist_SF |
| Eugenia siamensis         | Myrtaceae         | Tree | 1 | 1563  | 3    | Specialist_OF |
| Eugenia syzygioides       | Myrtaceae         | Tree | 1 | 1245  | 1549 | Specialist_SF |
| Excoecaria oppositifolia  | Euphorbiaceae     | Tree | 1 | 1001  | 1    | Specialist_OF |
| Ficus vasculosa           | Moraceae          | Tree | 1 | 103   | 0    | Specialist_OF |
| Garcinia benthamii        | Clusiaceae        | Tree | 1 | 937   | 21   | Specialist_OF |
| Glycosmis cochinchinensis | Rutaceae          | Tree | 1 | 166   | 0    | Specialist_OF |
| Glycosmis mauritiana      | Rutaceae          | Tree | 1 | 1459  | 0    | Specialist_OF |
| Gonocaryum lobbianum      | Cardiopteridaceae | Tree | 1 | 8021  | 533  | Specialist_OF |
| Helicia formosana         | Proteaceae        | Tree | 1 | 1634  | 17   | Specialist_OF |
| Hibiscus macrophyllus     | Malvaceae         | Tree | 1 | 10    | 81   | Specialist_SF |
| Horsfieldia amygdalina    | Myristicaceae     | Tree | 1 | 80    | 6    | Generalist    |
| Knema elegans             | Myristicaceae     | Tree | 1 | 11563 | 10   | Specialist_OF |
| Lasianthus hirsutus       | Myristicaceae     | Tree | 1 | 152   | 0    | Specialist_OF |
| Lasianthus kurzii         | Myristicaceae     | Tree | 1 | 1617  | 5    | Specialist_OF |
| Lasianthus lucidus        | Myristicaceae     | Tree | 1 | 453   | 0    | Specialist_OF |
| Lasianthus sp.            | Myristicaceae     | Tree | 1 | 141   | 0    | Specialist_OF |
| Lasianthus wallichii      | Myristicaceae     | Tree | 1 | 344   | 0    | Specialist_OF |

|                             |                 |      |   |       |      |               |
|-----------------------------|-----------------|------|---|-------|------|---------------|
| Lithocarpus eucalyptifolius | Fagaceae        | Tree | 1 | 1898  | 1    | Specialist_OF |
| Litsea beusekomii           | Lauraceae       | Tree | 1 | 644   | 0    | Specialist_OF |
| Litsea martiniana           | Lauraceae       | Tree | 1 | 302   | 2    | Specialist_OF |
| Litsea umbellata            | Lauraceae       | Tree | 1 | 351   | 12   | Specialist_OF |
| Litsea verticillata         | Lauraceae       | Tree | 1 | 1648  | 3    | Specialist_OF |
| Machilus gamblei            | Lauraceae       | Tree | 1 | 544   | 1461 | Specialist_SF |
| Memecylon edule             | Melastomataceae | Tree | 1 | 1491  | 1031 | Specialist_SF |
| Memecylon lilacinum         | Melastomataceae | Tree | 1 | 3877  | 634  | Generalist    |
| Memecylon ovatum            | Melastomataceae | Tree | 1 | 11    | 0    | Too_rare      |
| Microtropis pallens         | Celastraceae    | Tree | 1 | 5     | 0    | Too_rare      |
| Miliusa lineata             | Annonaceae      | Tree | 1 | 1449  | 1    | Specialist_OF |
| Mischocarpus pentapetalus   | Sapindaceae     | Tree | 1 | 742   | 20   | Specialist_OF |
| Monoon simiarum             | Annonaceae      | Tree | 1 | 3340  | 1    | Specialist_OF |
| Nephelium mel-liferum       | Sapindaceae     | Tree | 1 | 2279  | 0    | Specialist_OF |
| Nothapodytes montana        | Icacinaceae     | Tree | 1 | 115   | 40   | Generalist    |
| Olea brachiata              | Oleaceae        | Tree | 1 | 332   | 1217 | Specialist_SF |
| Pavetta indica              | Rubiaceae       | Tree | 1 | 119   | 4    | Specialist_OF |
| Phoebe lanceolata           | Lauraceae       | Tree | 1 | 1959  | 100  | Specialist_OF |
| Phyllanthus acutissimus     | Phyllanthaceae  | Tree | 1 | 2159  | 0    | Specialist_OF |
| Podocarpus imbricatus       | Podocarpaceae   | Tree | 1 | 4     | 0    | Too_rare      |
| Podocarpus nerriifolius     | Podocarpaceae   | Tree | 1 | 87    | 2    | Specialist_OF |
| Polyalthia khaoyaiensis     | Annonaceae      | Tree | 1 | 53214 | 0    | Specialist_OF |
| Prismatomeris tetrandra     | Rubiaceae       | Tree | 1 | 410   | 0    | Specialist_OF |
| Prunus javanica             | Rosaceae        | Tree | 1 | 213   | 0    | Specialist_OF |
| Psychotria ophi-oxyloides   | Rubiaceae       | Tree | 1 | 89    | 0    | Specialist_OF |
| Psychotria rubra            | Rubiaceae       | Tree | 1 | 59    | 0    | Specialist_OF |
| Saprosma longi-folium       | Rubiaceae       | Tree | 1 | 2709  | 0    | Specialist_OF |
| Schima wallichii            | Theaceae        | Tree | 1 | 831   | 3210 | Specialist_SF |
| Walsura robusta             | Meliaceae       | Tree | 1 | 3051  | 2    | Specialist_OF |
| Aglaia edulis               | Meliaceae       | Tree | 2 | 71    | 14   | Generalist    |
| Aidia densiflora            | Rubiaceae       | Tree | 2 | 925   | 3    | Specialist_OF |

|                                |                  |       |   |      |      |               |
|--------------------------------|------------------|-------|---|------|------|---------------|
| Allophyllus<br>cobbe           | Sapindaceae      | Tree  | 2 | 373  | 0    | Specialist_OF |
| Aquilaria<br>crassna           | Thymelaeaceae    | Tree  | 2 | 2849 | 104  | Specialist_OF |
| Balakata baccata               | Euphorbiaceae    | Tree  | 2 | 66   | 6    | Generalist    |
| Bridelia insulana              | Phyllanthaceae   | Tree  | 2 | 148  | 2    | Specialist_OF |
| Choerospondias<br>axillaris    | Anacardiaceae    | Tree  | 2 | 218  | 51   | Generalist    |
| Elaeocarpus<br>sphaericus      | Elaeocarpaceae   | Tree  | 2 | 534  | 0    | Specialist_OF |
| Excoecaria<br>cochinchinensis  | Euphorbiaceae    | Tree  | 2 | 19   | 0    | Too_rare      |
| Gironniera ner-<br>vosa        | Cannabaceae      | Tree  | 2 | 1438 | 0    | Specialist_OF |
| Gomphandra<br>tetrandra        | Stemonuraceae    | Tree  | 2 | 215  | 277  | Specialist_SF |
| Hopea odorata                  | Dipterocarpaceae | Tree  | 2 | 1    | 0    | Too_rare      |
| Lasianthus<br>chinensis        | Rubiaceae        | Tree  | 2 | 81   | 0    | Specialist_OF |
| Leea indica                    | Vitaceae         | Tree  | 2 | 153  | 3    | Specialist_OF |
| Macaranga den-<br>ticulata     | Euphorbiaceae    | Tree  | 2 | 3    | 0    | Too_rare      |
| Mastixia pentan-<br>dra        | Nyssaceae        | Tree  | 2 | 3475 | 22   | Specialist_OF |
| Melastoma ori-<br>entale       | Melastomataceae  | Tree  | 2 | 754  | 222  | Generalist    |
| Melicope ptelei-<br>folia      | Rutaceae         | Tree  | 2 | 4668 | 1147 | Generalist    |
| Polyosma cf. in-<br>tegrifolia | Polyosmaceae     | Tree  | 2 | 852  | 0    | Specialist_OF |
| Sandoricum<br>koetjape         | Meliaceae        | Tree  | 2 | 53   | 0    | Specialist_OF |
| Sarcosperma ar-<br>boreum      | Sapotaceae       | Tree  | 2 | 493  | 7    | Specialist_OF |
| Saurauia rox-<br>burghii       | Actinidiaceae    | Tree  | 2 | 160  | 0    | Specialist_OF |
| Symplocos<br>cochinchinensis   | Symplocaceae     | Tree  | 2 | 7031 | 903  | Generalist    |
| Aganosma<br>schlechteriana     | Apocynaceae      | Liana | 1 | 11   | 43   | Specialist_SF |
| Anodendron af-<br>fine         | Apocynaceae      | Liana | 1 | 13   | 0    | Too_rare      |
| Celastrus ap-<br>proximata     | Celastraceae     | Liana | 1 | 202  | 0    | Specialist_OF |
| Desmos du-<br>mosus            | Annonaceae       | Liana | 1 | 142  | 1241 | Specialist_SF |
| Elaeagnus con-<br>ferta        | Elaeagnaceae     | Liana | 1 | 65   | 0    | Specialist_OF |
| Erycibe elliptil-<br>imba      | Convolvulaceae   | Liana | 1 | 170  | 0    | Specialist_OF |
| Erycibe subspi-<br>cata        | Convolvulaceae   | Liana | 1 | 94   | 10   | Generalist    |

|                         |                 |       |   |     |     |               |
|-------------------------|-----------------|-------|---|-----|-----|---------------|
| Fissistigma oblongum    | Annonaceae      | Liana | 1 | 103 | 104 | Generalist    |
| Gnetum macrostachyum    | Gnetaceae       | Liana | 1 | 52  | 5   | Generalist    |
| Gnetum montanum         | Gnetaceae       | Liana | 1 | 65  | 21  | Generalist    |
| Grewia acuminata        | Tileaceae       | Liana | 1 | 27  | 1   | Specialist_OF |
| Jasminum scandens       | Oleaceae        | Liana | 1 | 0   | 403 | Specialist_SF |
| Linostoma pauciflorum   | Thymelaeaceae   | Liana | 1 | 50  | 0   | Specialist_OF |
| Oxyceros longiflora     | Rubiaceae       | Liana | 1 | 100 | 0   | Specialist_OF |
| Paramignya scandens     | Rutaceae        | Liana | 1 | 6   | 1   | Too_rare      |
| Reissentia indica       | Celastraceae    | Liana | 1 | 43  | 1   | Specialist_OF |
| Rourea minor            | Connaraceae     | Liana | 1 | 74  | 4   | Specialist_OF |
| Salacia chinensis       | Celastraceae    | Liana | 1 | 137 | 125 | Generalist    |
| Sphenodesme mollis      | Verbenaceae     | Liana | 1 | 29  | 19  | Generalist    |
| Strychnos lanata        | Loganiaceae     | Liana | 1 | 8   | 0   | Too_rare      |
| Tetracera indica        | Dilleniaceae    | Liana | 1 | 528 | 11  | Specialist_OF |
| Uvaria concova          | Annonaceae      | Liana | 1 | 114 | 1   | Specialist_OF |
| Uvaria littoralis       | Annonaceae      | Liana | 1 | 81  | 11  | Generalist    |
| Uvaria micrantha        | Annonaceae      | Liana | 1 | 201 | 262 | Specialist_SF |
| Ventilago leiocarpa     | Rhamnaceae      | Liana | 1 | 22  | 0   | Too_rare      |
| Caelospermum truncatum  | Rubiaceae       | Liana | 2 | 209 | 8   | Specialist_OF |
| Chilocarpus denudatus   | Apocynaceae     | Liana | 2 | 85  | 0   | Specialist_OF |
| Chonemorpha fragrans    | Apocynaceae     | Liana | 2 | 180 | 6   | Specialist_OF |
| Coptosapelta flavescens | Rubiaceae       | Liana | 2 | 67  | 63  | Generalist    |
| Diplectria barbata      | Melastomataceae | Liana | 2 | 171 | 0   | Specialist_OF |
| Diploclisia glaucescens | Menispermaceae  | Liana | 2 | 144 | 0   | Specialist_OF |
| Embelia cf. kerrii      | Myrsinaceae     | Liana | 2 | 19  | 1   | Too_rare      |
| Ficus punctata          | Moraceae        | Liana | 2 | 24  | 0   | Specialist_OF |
| Ficus villosa           | Moraceae        | Liana | 2 | 18  | 0   | Too_rare      |
| Gymnema latifolium      | Asclepiadaceae  | Liana | 2 | 4   | 0   | Too_rare      |
| Hypserpa nitida         | Menispermaceae  | Liana | 2 | 71  | 32  | Generalist    |
| Illigera pierrei        | Hernandiaceae   | Liana | 2 | 117 | 0   | Specialist_OF |
| Melodinus fusiformis    | Apocynaceae     | Liana | 2 | 110 | 0   | Specialist_OF |
| Morinda villosa         | Rubiaceae       | Liana | 2 | 221 | 19  | Specialist_OF |

|                          |                |       |   |     |     |               |
|--------------------------|----------------|-------|---|-----|-----|---------------|
| Naravelia laurifolia     | Ranunculaceae  | Liana | 2 | 4   | 0   | Too_rare      |
| Neuropeltis racemosa     | Convolvulaceae | Liana | 2 | 164 | 0   | Specialist_OF |
| Piper retrofractum       | Piperaceae     | Liana | 2 | 38  | 0   | Specialist_OF |
| Piper ribesoides         | Piperaceae     | Liana | 2 | 34  | 0   | Specialist_OF |
| Sabia limoniacea         | Sabiaceae      | Liana | 2 | 338 | 1   | Specialist_OF |
| Spatholobus harmandii    | Sapindaceae    | Liana | 2 | 232 | 150 | Generalist    |
| Tetrastigma erubescens   | Vitaceae       | Liana | 2 | 236 | 0   | Specialist_OF |
| Tetrastigma godefroyanum | Vitaceae       | Liana | 2 | 99  | 0   | Specialist_OF |
| Toddalia asiatica        | Rutaceae       | Liana | 2 | 63  | 11  | Generalist    |
| Toxocarpus villosus      | Apocynaceae    | Liana | 2 | 1   | 0   | Too_rare      |
| Uncaria scandens         | Rubiaceae      | Liana | 2 | 665 | 0   | Specialist_OF |
| Urceola micrantha        | Apocynaceae    | Liana | 2 | 86  | 46  | Generalist    |
| Ventilago denticulata    | Rhamnaceae     | Liana | 2 | 115 | 1   | Specialist_OF |
| Ziziphus atropensis      | Rhamnaceae     | Liana | 2 | 24  | 2   | Generalist    |

Figure S1. PCA analysis of traits for both lianas and tree seedling species. Names indicated species of lianas and trees. Read names in the figure correspond to abbreviation of traits measured. LA is leaf area in cm<sup>2</sup>, LDMC is leaf dry matter content in g g<sup>-1</sup>, SLA is specific leaf area in cm<sup>2</sup> g<sup>-1</sup>, LAR is leaf area ratio in cm<sup>2</sup> g<sup>-1</sup>, LMF is leaf mass fraction in g g<sup>-1</sup>, SDMC is stem dry matter content in g g<sup>-1</sup>, SMF is stem mass fraction g g<sup>-1</sup>, SSL is specific stem length in cm g<sup>-1</sup>, RDMC is root dry matter content in g g<sup>-1</sup>, RMF is root mass fraction in g g<sup>-1</sup>, SRL is specific root length cm g<sup>-1</sup>.





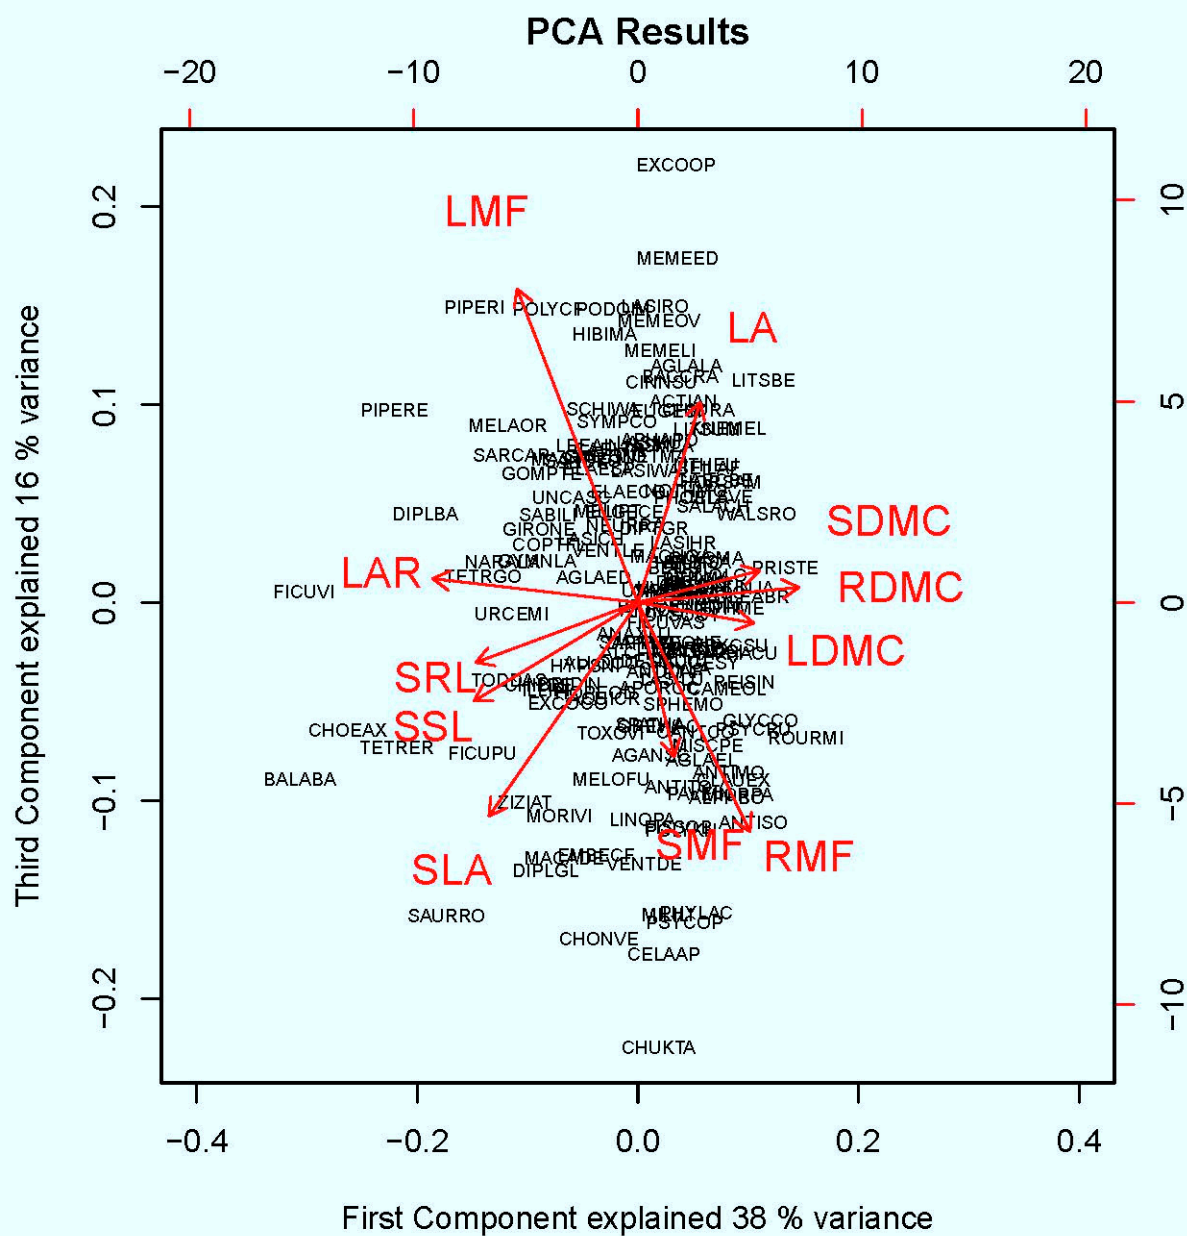

Supplement: s1 [file s1]
